# Supplementary material for: Carboxyketenes, methyleneketenes, vinylketenes, oxetanediones, ynols, and ylidic ketenes from Meldrum's acid derivatives
Source: Royal Society of Chemistry journal article supplement (doi:10.1039/b702518a), 2007-01-01
Supplement: b702518a.pdf [file b702518a.pdf]

## Supporting Information

### Carboxyketenes, Methyleneketenes, Vinylketenes, Oxetanediones, Ynols, and Ylidic Ketenes from Meldrum's Acid Derivatives

Lisa George,<sup>a</sup> Ming Wah Wong<sup>b</sup> and Curt Wentrup<sup>a\*</sup>

<sup>a</sup>Chemistry Building, School of Molecular and Microbial Sciences, The University of Queensland, Brisbane, Qld 4072, Australia. <sup>b</sup>Department of Chemistry, National University of Singapore, 3 Science Drive, Singapore 117543, Singapore

[wentrup@uq.edu.au](mailto:wentrup@uq.edu.au) and [chmwmw@nus.sg](mailto:chmwmw@nus.sg)

|                                                                                                           |              |
|-----------------------------------------------------------------------------------------------------------|--------------|
| Figure S1. IRC curve of TS <b>24</b>                                                                      | page S2      |
| Figure S2. IRC curve of TS <b>26</b>                                                                      | page S3      |
| Figure S3. IRC curve of TS <b>33</b>                                                                      | page S4      |
| Relative energies of various species obtained by B3LYP/6-311+G(2d,p) and B3LYP/6-31G(d).                  | page S5      |
| Tables of Cartesian coordinates and energies for all the calculated species at B3LYP/6-311+G(2d,p) level. | page S6-S20  |
| Tables of Cartesian coordinates and energies for species <b>35-39</b> at B3LYP/6-31G(2df,p) level.        | page S21-S23 |

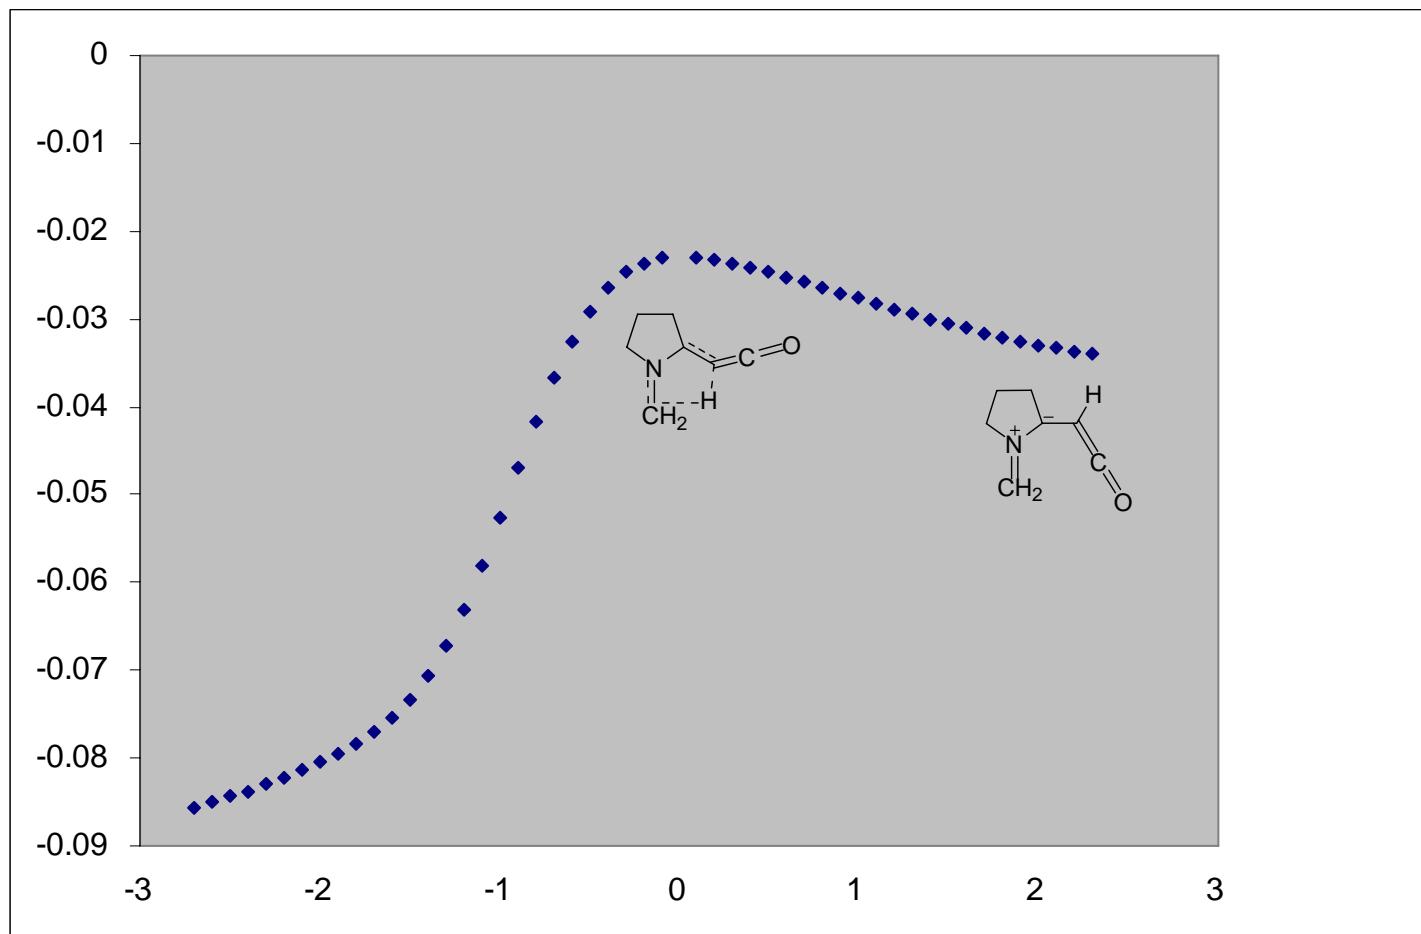

Figure S1. IRC curve for TS24, transition state connecting methyleneketene **21** (-3)

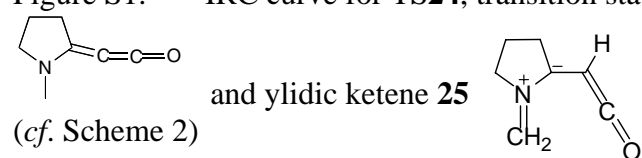

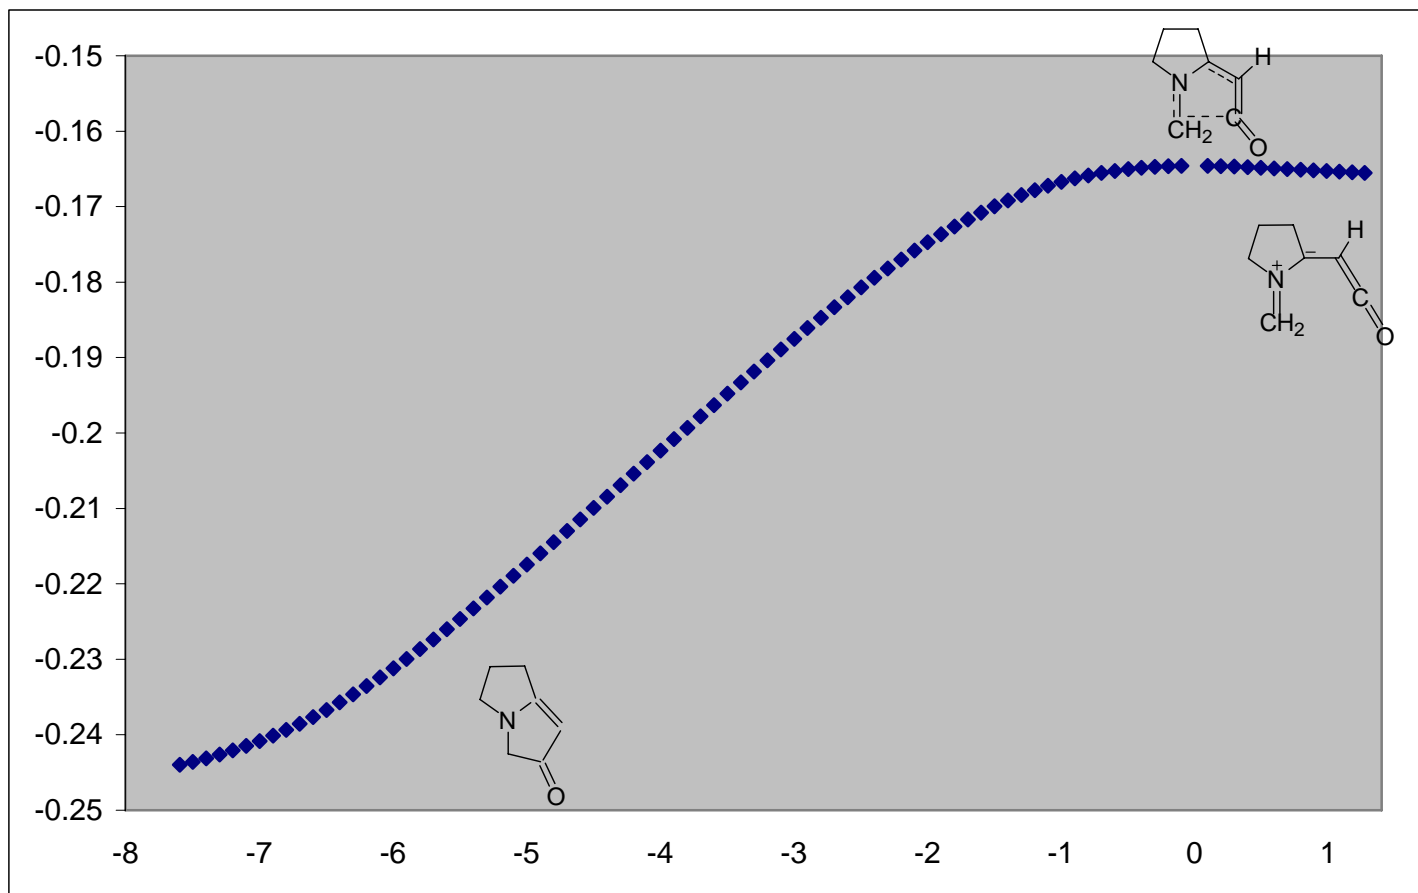

Figure S2. IRC curve of TS26, transition state connecting structures **25** and **27** (Scheme 2).

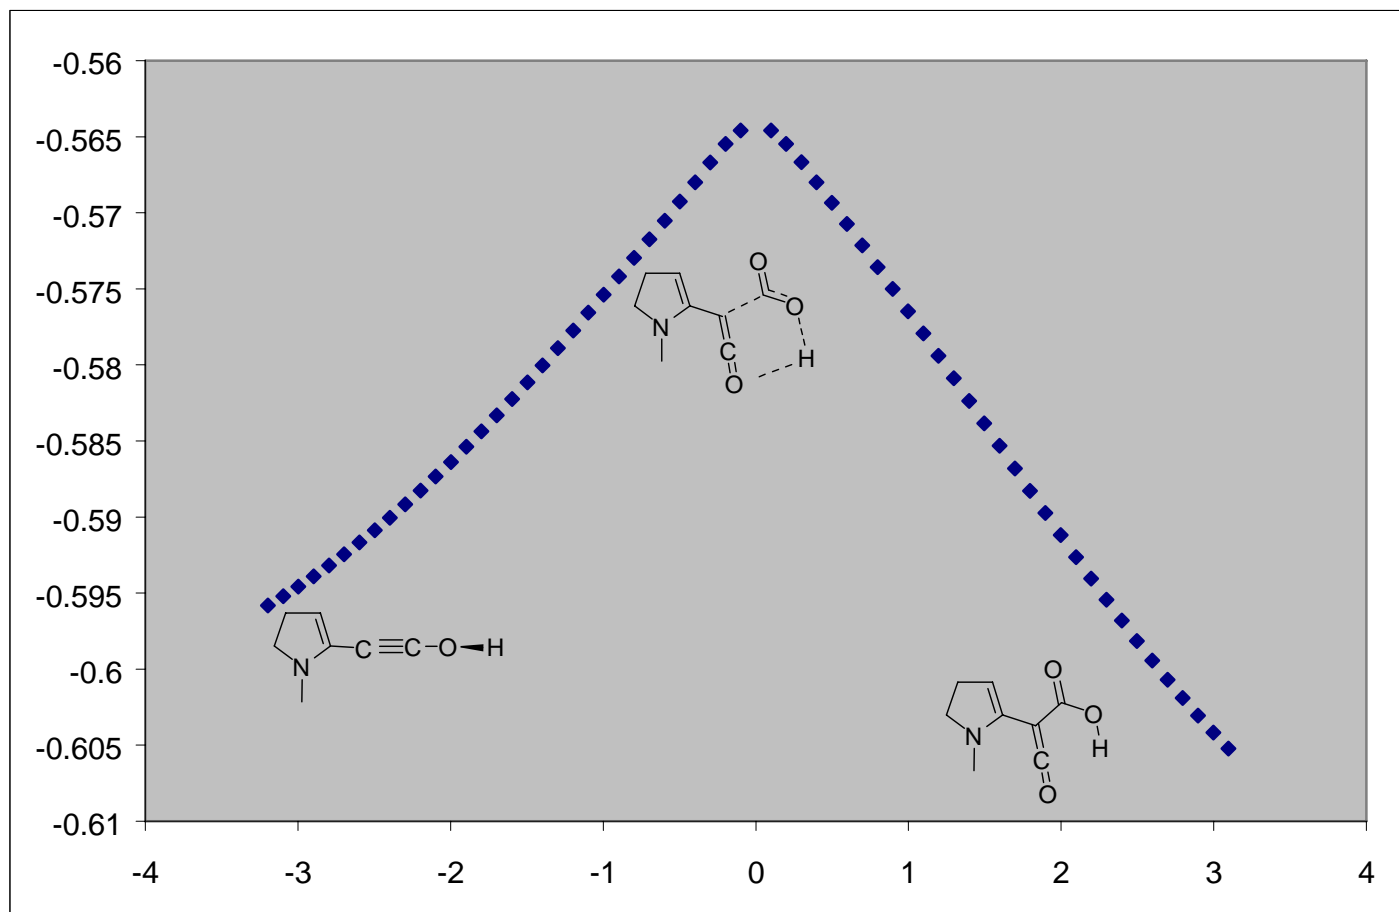

Figure S3. IRC curve of TS33, transition state connecting structures **32** and **34** (eq. 2).

| Ser.No. | Structures  | $\Delta E$ (kcal/mol)B3LYP/6-311+G(2d,p) | $\Delta E$ (kcal/mol)B3LYP/6-31G(d) |
|---------|-------------|------------------------------------------|-------------------------------------|
| 1       | <b>12</b>   | 0                                        | 0                                   |
| 2       | <b>13</b>   | 23.22                                    | 27.28                               |
| 3       | <b>19</b>   | 8.81                                     | 14.02                               |
| 4       | <b>TS14</b> | 37.03                                    | 42.73                               |
| 4a      | <b>TS15</b> | 41.17                                    | 48.89                               |
| 5       | <b>19</b>   | 0                                        | 0                                   |
| 6       | <b>16</b>   | 20.86                                    | 27.82                               |
| 7       | <b>18</b>   | 9.42                                     | 17.52                               |
| 8       | <b>TS17</b> | 65.43                                    | 71.75                               |
| 9       | <b>121</b>  | 1.61                                     | 8.90                                |
| 10      | <b>TS23</b> | 33.12                                    | 38.59                               |
| 11      | <b>TS22</b> | 64.49                                    | 73.23                               |
| 12      | <b>TS20</b> | 18.88                                    | 22.98                               |
| 13      | <b>25</b>   | 30.16                                    | 39.68                               |
| 14      | <b>27</b>   | -17.34                                   | -11.58                              |
| 15      | <b>TS24</b> | 39.66                                    | 48.20                               |
| 16      | <b>TS26</b> | 31.15                                    | 40.51                               |
| 17      | <b>32</b>   | 26.62                                    | 33.92                               |
| 18      | <b>34</b>   | 40.44                                    | 52.60                               |
| 19      | <b>TS33</b> | 65.53                                    | 73.48                               |

**Relative energies of various species obtained by B3LYP/6-311+G(2d,p) and B3LYP/6-31G(d). Relative energy of 13, TS 14 and TS 15 are relative to 12. Relative energies of all others are relative to 19. The energy of 19 + acetone is 21.36 kcal/mol above that of 12.**

Tables of Cartesian coordinates and energies for all the calculated species at  
B3LYP/6-311+G(2d,p) level

**A: CO<sub>2</sub>**

| Center<br>Number | Atomic<br>Number | Coordinates (Angstroms) |          |           |
|------------------|------------------|-------------------------|----------|-----------|
|                  |                  | X                       | Y        | Z         |
| 1                | 6                | 0.000000                | 0.000000 | 0.000000  |
| 2                | 8                | 0.000000                | 0.000000 | 1.160367  |
| 3                | 8                | 0.000000                | 0.000000 | -1.160367 |

Energy = -188.6506395

E+ZPVE = -188.638985

**B: Acetone**

| Center<br>Number | Atomic<br>Number | Coordinates (Angstroms) |           |           |
|------------------|------------------|-------------------------|-----------|-----------|
|                  |                  | X                       | Y         | Z         |
| 1                | 6                | 0.000079                | 0.183884  | 0.000000  |
| 2                | 8                | -0.000012               | 1.394477  | 0.000000  |
| 3                | 6                | -0.000012               | -0.611430 | 1.289585  |
| 4                | 1                | 0.000006                | 0.062746  | 2.143691  |
| 5                | 1                | -0.878517               | -1.261796 | 1.332731  |
| 6                | 1                | 0.878393                | -1.261925 | 1.332784  |
| 7                | 6                | -0.000012               | -0.611430 | -1.289585 |
| 8                | 1                | 0.878393                | -1.261925 | -1.332784 |
| 9                | 1                | -0.878517               | -1.261796 | -1.332731 |
| 10               | 1                | 0.000006                | 0.062746  | -2.143691 |

Energy = -193.2228467

E+ZPVE = -193.139795

**C: 5-(N-Methylpyrrolidin-2-ylidene)dioxanedione 12**

| Center<br>Number | Atomic<br>Number | Coordinates (Angstroms) |           |           |
|------------------|------------------|-------------------------|-----------|-----------|
|                  |                  | X                       | Y         | Z         |
| 1                | 8                | 0.304132                | -2.315569 | -0.887396 |
| 2                | 6                | 0.737678                | -1.236576 | -0.544843 |
| 3                | 6                | 0.596424                | 1.193345  | 0.137987  |

|    |   |           |           |           |
|----|---|-----------|-----------|-----------|
| 4  | 8 | 0.057647  | 2.208827  | 0.526177  |
| 5  | 8 | 2.092723  | -1.053614 | -0.620488 |
| 6  | 8 | 1.959851  | 1.224990  | -0.030177 |
| 7  | 6 | 2.702727  | 0.013120  | 0.110174  |
| 8  | 6 | 4.050407  | 0.259275  | -0.538196 |
| 9  | 1 | 4.661965  | -0.640989 | -0.476472 |
| 10 | 1 | 3.908918  | 0.521818  | -1.586262 |
| 11 | 1 | 4.561917  | 1.077602  | -0.031201 |
| 12 | 6 | 2.812133  | -0.363402 | 1.585123  |
| 13 | 1 | 1.825088  | -0.529226 | 2.019439  |
| 14 | 1 | 3.395224  | -1.278905 | 1.689398  |
| 15 | 1 | 3.302173  | 0.440071  | 2.135713  |
| 16 | 6 | -0.054139 | -0.073842 | -0.149477 |
| 17 | 6 | -2.100961 | -1.489393 | 0.557316  |
| 18 | 6 | -3.708491 | 0.280824  | 0.309553  |
| 19 | 6 | -3.606164 | -1.243979 | 0.384045  |
| 20 | 1 | -1.819380 | -1.588563 | 1.611279  |
| 21 | 1 | -1.726238 | -2.368311 | 0.041717  |
| 22 | 1 | -3.887754 | 0.738954  | 1.287940  |
| 23 | 1 | -4.478623 | 0.637399  | -0.374961 |
| 24 | 1 | -4.202056 | -1.661173 | 1.194503  |
| 25 | 1 | -3.954657 | -1.684960 | -0.551578 |
| 26 | 6 | -1.444277 | -0.233131 | 0.021237  |
| 27 | 7 | -2.382503 | 0.685597  | -0.186234 |
| 28 | 6 | -2.248045 | 1.939646  | -0.912861 |
| 29 | 1 | -1.387507 | 1.883839  | -1.574329 |
| 30 | 1 | -3.153860 | 2.077371  | -1.506535 |
| 31 | 1 | -2.106276 | 2.783503  | -0.240269 |

-----  
Energy = -784.1150593

E+ZPVE = -783.861423

### D: Enol 13

| Center<br>Number | Atomic<br>Number | Coordinates (Angstroms) |           |           |
|------------------|------------------|-------------------------|-----------|-----------|
|                  |                  | X                       | Y         | Z         |
| 1                | 6                | -0.695921               | 1.234570  | 0.164196  |
| 2                | 6                | -0.622433               | -0.967796 | -0.824411 |
| 3                | 8                | -0.098504               | -1.906398 | -1.367813 |
| 4                | 8                | -2.022075               | 1.246754  | 0.166859  |
| 5                | 8                | -2.008292               | -0.890814 | -0.839545 |
| 6                | 6                | -2.668428               | -0.059492 | 0.100177  |
| 7                | 6                | -4.058959               | 0.201135  | -0.437568 |
| 8                | 1                | -4.597493               | 0.875602  | 0.228268  |
| 9                | 1                | -3.992113               | 0.650438  | -1.427800 |
| 10               | 1                | -4.602936               | -0.740195 | -0.511616 |
| 11               | 6                | -2.667108               | -0.682397 | 1.490574  |

|    |   |           |           |           |
|----|---|-----------|-----------|-----------|
| 12 | 1 | -1.652207 | -0.812279 | 1.865779  |
| 13 | 1 | -3.218299 | -0.045984 | 2.183349  |
| 14 | 1 | -3.148211 | -1.659617 | 1.444121  |
| 15 | 6 | 0.057217  | 0.160574  | -0.216290 |
| 16 | 6 | 2.286509  | 1.162579  | -0.821465 |
| 17 | 6 | 3.702447  | -0.389662 | 0.258944  |
| 18 | 6 | 3.733430  | 0.995540  | -0.416832 |
| 19 | 1 | 1.916864  | 1.888738  | -1.530206 |
| 20 | 1 | 4.371926  | -0.473891 | 1.116319  |
| 21 | 1 | 3.965385  | -1.177707 | -0.463294 |
| 22 | 1 | 4.047432  | 1.773057  | 0.291144  |
| 23 | 1 | 4.429385  | 1.026592  | -1.256839 |
| 24 | 6 | 1.530603  | 0.248249  | -0.177424 |
| 25 | 7 | 2.300381  | -0.553701 | 0.676538  |
| 26 | 6 | 1.897514  | -1.889731 | 1.072757  |
| 27 | 1 | 0.864690  | -1.883711 | 1.418053  |
| 28 | 1 | 1.982336  | -2.616794 | 0.255141  |
| 29 | 1 | 2.526259  | -2.213122 | 1.904928  |
| 30 | 8 | -0.211444 | 2.404702  | 0.560856  |
| 31 | 1 | 0.757603  | 2.369407  | 0.428102  |

Energy = -784.0768303

E+ZPVE = -783.824412

### E: Z-carboxyketene 16

| Center<br>Number | Atomic<br>Number | Coordinates (Angstroms) |           |           |
|------------------|------------------|-------------------------|-----------|-----------|
|                  |                  | X                       | Y         | Z         |
| 1                | 6                | 1.905550                | -0.882093 | 0.285440  |
| 2                | 6                | 1.428465                | 1.252696  | -0.635374 |
| 3                | 8                | 1.856254                | 2.260059  | -0.988459 |
| 4                | 8                | 3.089146                | -0.658178 | 0.325657  |
| 5                | 6                | 0.910369                | 0.099940  | -0.221247 |
| 6                | 6                | -2.642240               | -1.035751 | -0.778117 |
| 7                | 6                | -2.779165               | 0.127712  | 0.222371  |
| 8                | 1                | -3.036712               | -0.761185 | -1.763847 |
| 9                | 1                | -3.185245               | -1.924782 | -0.452279 |
| 10               | 1                | -3.576988               | 0.828874  | -0.024083 |
| 11               | 1                | -2.965531               | -0.261098 | 1.234279  |
| 12               | 6                | -0.546926               | -0.135399 | -0.293695 |
| 13               | 7                | -1.463797               | 0.803427  | 0.205585  |
| 14               | 6                | -1.166293               | 1.570365  | 1.407077  |
| 15               | 1                | -1.167501               | 0.943441  | 2.311613  |
| 16               | 1                | -0.198512               | 2.061484  | 1.327692  |
| 17               | 1                | -1.924188               | 2.345770  | 1.525675  |
| 18               | 6                | -1.144786               | -1.207628 | -0.849470 |
| 19               | 1                | -0.642877               | -1.943485 | -1.460859 |



|    |   |          |           |          |
|----|---|----------|-----------|----------|
| 20 | 8 | 1.395290 | -2.051254 | 0.719617 |
| 21 | 1 | 0.428770 | -2.057092 | 0.586292 |

Energy = -590.8367668  
 E+ZPVE = -590.674343

### F: Pyrrolinyketene 18

| Center Number | Atomic Number | Coordinates (Angstroms) |           |           |
|---------------|---------------|-------------------------|-----------|-----------|
|               |               | X                       | Y         | Z         |
| 1             | 6             | 1.187266                | -1.061101 | 0.280955  |
| 2             | 6             | 2.293533                | -0.436396 | -0.060796 |
| 3             | 8             | 3.297116                | 0.080982  | -0.336952 |
| 4             | 6             | -1.973523               | 0.831375  | -0.119085 |
| 5             | 6             | -2.494983               | -0.611746 | -0.220755 |
| 6             | 1             | -2.206356               | 1.244250  | 0.874225  |
| 7             | 1             | -2.383331               | 1.504465  | -0.873390 |
| 8             | 1             | -3.361661               | -0.778720 | 0.422984  |
| 9             | 1             | -2.805516               | -0.849889 | -1.246496 |
| 10            | 7             | -0.505144               | 0.720651  | -0.266216 |
| 11            | 6             | 0.214025                | 1.831748  | 0.339858  |
| 12            | 1             | 0.071232                | 1.881306  | 1.430976  |
| 13            | 1             | 1.281096                | 1.783251  | 0.129402  |
| 14            | 1             | -0.153600               | 2.762241  | -0.095649 |
| 15            | 1             | 1.344669                | -2.060885 | 0.670178  |
| 16            | 6             | -1.271120               | -1.398583 | 0.168564  |
| 17            | 1             | -1.245023               | -2.469076 | 0.307423  |
| 18            | 6             | -0.185601               | -0.606855 | 0.101172  |

Energy = -402.2004313  
 E+ZPVE = -402.053582

### G: TS17, connecting 16 and 18

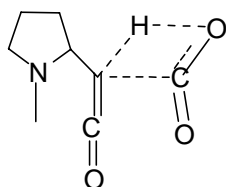

| Center Number | Atomic Number | Coordinates (Angstroms) |           |           |
|---------------|---------------|-------------------------|-----------|-----------|
|               |               | X                       | Y         | Z         |
| 1             | 6             | 1.857991                | -0.795381 | 0.689391  |
| 2             | 6             | 1.408898                | 1.018975  | -1.063628 |
| 3             | 8             | 1.985295                | 1.896417  | -1.527705 |

|    |   |           |           |           |
|----|---|-----------|-----------|-----------|
| 4  | 8 | 1.917238  | -0.437489 | 1.818562  |
| 5  | 6 | 0.853732  | -0.073546 | -0.531078 |
| 6  | 6 | -2.818844 | -0.899096 | -0.682410 |
| 7  | 6 | -2.729205 | 0.179018  | 0.415684  |
| 8  | 1 | -3.307955 | -0.509916 | -1.583848 |
| 9  | 1 | -3.389859 | -1.770874 | -0.357472 |
| 10 | 1 | -3.497775 | 0.948931  | 0.340267  |
| 11 | 1 | -2.803128 | -0.285916 | 1.409776  |
| 12 | 6 | -0.619326 | -0.212969 | -0.406485 |
| 13 | 7 | -1.382517 | 0.770135  | 0.258302  |
| 14 | 6 | -0.864496 | 1.412988  | 1.458554  |
| 15 | 1 | -0.827631 | 0.729619  | 2.318225  |
| 16 | 1 | 0.140989  | 1.796870  | 1.290196  |
| 17 | 1 | -1.506295 | 2.258870  | 1.709781  |
| 18 | 6 | -1.362318 | -1.183141 | -0.952016 |
| 19 | 1 | -0.990381 | -1.962843 | -1.598890 |
| 20 | 8 | 2.340288  | -1.726961 | -0.036218 |
| 21 | 1 | 1.558489  | -1.132503 | -0.941332 |

-----  
Energy = -590.7590005

E+ZPVE = -590.603312

Imaginary frequency = -1739.4 cm<sup>-1</sup>

### H: Oxetanedione 19

| Center<br>Number | Atomic<br>Number | Coordinates (Angstroms) |           |           |
|------------------|------------------|-------------------------|-----------|-----------|
|                  |                  | X                       | Y         | Z         |
| 1                | 6                | 1.854389                | -1.064358 | 0.015122  |
| 2                | 6                | 1.829664                | 0.939773  | -0.034732 |
| 3                | 8                | 1.979077                | 2.122243  | -0.071882 |
| 4                | 8                | 2.860615                | -0.038909 | -0.028203 |
| 5                | 8                | 2.041331                | -2.238450 | 0.036739  |
| 6                | 6                | 0.780118                | -0.079752 | 0.012270  |
| 7                | 6                | -2.715903               | -1.268153 | -0.261812 |
| 8                | 6                | -2.883998               | 0.212284  | 0.094431  |
| 9                | 1                | -2.852340               | -1.408888 | -1.335474 |
| 10               | 1                | -3.432731               | -1.904917 | 0.254500  |
| 11               | 1                | -3.540710               | 0.752627  | -0.590277 |
| 12               | 1                | -3.267182               | 0.357562  | 1.111976  |
| 13               | 6                | -0.582543               | -0.214420 | 0.033158  |
| 14               | 7                | -1.518351               | 0.741477  | -0.003386 |
| 15               | 6                | -1.295836               | 2.176923  | 0.049108  |
| 16               | 1                | -1.629407               | 2.574618  | 1.012865  |
| 17               | 1                | -0.241534               | 2.408298  | -0.080240 |
| 18               | 1                | -1.870184               | 2.664118  | -0.742206 |
| 19               | 6                | -1.258682               | -1.563932 | 0.130114  |
| 20               | 1                | -0.767747               | -2.310620 | -0.491389 |

21 1 -1.181143 -1.912397 1.164757

-----  
 Energy = -590.8718072  
 E+ZPVE = -590.707581

**I: TS14 connecting 12 and 19**

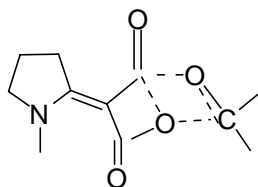

| Center Number | Atomic Number | Coordinates (Angstroms) |           |           |
|---------------|---------------|-------------------------|-----------|-----------|
|               |               | X                       | Y         | Z         |
| 1             | 8             | 0.469222                | 2.587737  | 0.206723  |
| 2             | 6             | 0.449787                | 1.433050  | 0.088935  |
| 3             | 6             | 0.538103                | -1.135952 | 0.638374  |
| 4             | 8             | -0.154981               | -1.701240 | 1.490438  |
| 5             | 8             | 2.201840                | 1.008140  | -0.815946 |
| 6             | 8             | 1.641562                | -1.472571 | 0.161982  |
| 7             | 6             | 3.038953                | 0.235298  | -0.328289 |
| 8             | 6             | 3.460585                | 0.324249  | 1.114774  |
| 9             | 1             | 4.351273                | 0.962460  | 1.158885  |
| 10            | 1             | 2.685552                | 0.778017  | 1.730176  |
| 11            | 1             | 3.715789                | -0.655729 | 1.511928  |
| 12            | 6             | 3.911549                | -0.574713 | -1.246084 |
| 13            | 1             | 3.465014                | -0.627348 | -2.236536 |
| 14            | 1             | 4.894271                | -0.096032 | -1.317285 |
| 15            | 1             | 4.047086                | -1.577499 | -0.842422 |
| 16            | 6             | -0.148897               | 0.202320  | 0.138356  |
| 17            | 6             | -2.368229               | 1.542971  | -0.021009 |
| 18            | 6             | -3.763628               | -0.382145 | -0.403464 |
| 19            | 6             | -3.806687               | 1.036845  | 0.165299  |
| 20            | 1             | -2.241045               | 2.065354  | -0.974891 |
| 21            | 1             | -2.046826               | 2.225991  | 0.762199  |
| 22            | 1             | -4.080994               | -0.429306 | -1.451332 |
| 23            | 1             | -4.366707               | -1.094181 | 0.162836  |
| 24            | 1             | -4.545277               | 1.662051  | -0.334254 |
| 25            | 1             | -4.054596               | 1.005154  | 1.227212  |
| 26            | 6             | -1.541917               | 0.272007  | -0.043241 |
| 27            | 7             | -2.343585               | -0.752343 | -0.313505 |
| 28            | 6             | -1.954528               | -2.114933 | -0.654006 |
| 29            | 1             | -0.988895               | -2.114966 | -1.156054 |
| 30            | 1             | -1.872340               | -2.729824 | 0.241511  |
| 31            | 1             | -2.708915               | -2.518248 | -1.330881 |

-----  
 Energy = -784.0506531

E+ZPVE = -783.802404  
Imaginary frequency = - 219.5cm<sup>-1</sup>

**Ia: TS 15** connecting **13** and **16**

QuickTime™ and a  
TIFF (Uncompressed) decompressor  
are needed to see this picture.

Atom type Coordinates (angstroms):

X Y Z

C -0.59172700 1.35429600 0.38307800  
C -0.49209000 -0.88730700 -0.79625900  
O -0.26178000 -1.94447100 -1.25547700  
O -1.78075000 1.45282400 0.67137500  
O -2.21330700 -0.47462700 -1.08716900  
C -3.00261900 -0.32439900 -0.13669700  
C -4.28544100 0.40161600 -0.39741000  
H -4.39580300 1.19789600 0.34000300  
H -4.28908000 0.82256000 -1.40005700  
H -5.12700700 -0.28710600 -0.27775800  
C -2.87168900 -1.05967500 1.16250200  
H -1.84676800 -1.36032300 1.36164700  
H -3.24840000 -0.45537200 1.98532800  
H -3.49155500 -1.96097000 1.08726200  
C 0.09120100 0.21156100 -0.21198500  
C 2.36617600 0.88272800 -1.09776000  
C 3.72676500 -0.49303500 0.25748700  
C 3.81431900 0.70817300 -0.70497800  
H 2.00717800 1.50873700 -1.90075300  
H 4.42912300 -0.43947900 1.09054600  
H 3.90822700 -1.43298900 -0.28691700  
H 4.19954900 1.59888700 -0.19228500  
H 4.47830500 0.51264000 -1.54891400  
C 1.58173600 0.19598500 -0.24638500  
N 2.33614100 -0.46827800 0.74194400  
C 1.85998700 -1.68677800 1.36678300  
H 0.83176200 -1.55499400 1.70058200  
H 1.90240700 -2.55392200 0.69135300

H 2.47238500 -1.90002500 2.24507800  
O 0.19834400 2.40807200 0.68248700  
H 1.09692800 2.22902400 0.35130400

Imaginary Frequency:  $-156.2626 \text{ cm}^{-1}$

HF =  $-784.0438062$  Hartree

Zero-point correction =  $0.247990$  (Hartree/Particle)

Sum of electronic and zero-point Energies =  $-783.795816$  Hartree

### J: Methyleneketene 21

---

| Center<br>Number | Atomic<br>Number | Coordinates (Angstroms) |           |           |
|------------------|------------------|-------------------------|-----------|-----------|
|                  |                  | X                       | Y         | Z         |
| 1                | 6                | 1.342163                | 0.428172  | -0.022454 |
| 2                | 6                | 2.555888                | 0.027961  | -0.014865 |
| 3                | 8                | 3.712463                | -0.190976 | -0.013773 |
| 4                | 6                | -2.277238               | -0.066792 | 0.114074  |
| 5                | 6                | -1.845676               | -1.506220 | -0.199862 |
| 6                | 1                | -2.667294               | 0.036276  | 1.135275  |
| 7                | 1                | -3.039095               | 0.313418  | -0.570535 |
| 8                | 1                | -2.419570               | -2.241448 | 0.363229  |
| 9                | 1                | -1.989973               | -1.710652 | -1.262342 |
| 10               | 7                | -1.040007               | 0.695157  | -0.031281 |
| 11               | 6                | -1.048661               | 2.141704  | -0.022101 |
| 12               | 1                | -1.413399               | 2.522958  | 0.937650  |
| 13               | 1                | -0.030761               | 2.492986  | -0.180721 |
| 14               | 1                | -1.696630               | 2.520528  | -0.816515 |
| 15               | 6                | 0.078674                | -0.059772 | 0.012727  |
| 16               | 6                | -0.346474               | -1.512788 | 0.141445  |
| 17               | 1                | 0.250407                | -2.155505 | -0.503654 |
| 18               | 1                | -0.165403               | -1.830442 | 1.172973  |

---

Energy =  $-402.214556$

E+ZPVE =  $-402.066031$

### K: TS23, connecting 16 and 21

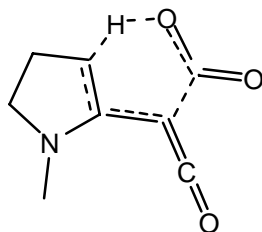

| Center Number | Atomic Number | Coordinates (Angstroms) |           |           |
|---------------|---------------|-------------------------|-----------|-----------|
|               |               | X                       | Y         | Z         |
| 1             | 6             | 0.909522                | 0.142069  | -0.176214 |
| 2             | 6             | 1.526650                | 1.291392  | -0.407239 |
| 3             | 8             | 2.075726                | 2.275936  | -0.642599 |
| 4             | 6             | 1.838083                | -1.036616 | 0.253320  |
| 5             | 8             | 3.022959                | -0.790733 | 0.381362  |
| 6             | 8             | 1.219875                | -2.142693 | 0.455032  |
| 7             | 1             | 0.015192                | -1.971559 | 0.132108  |
| 8             | 6             | -2.808583               | 0.153971  | 0.012305  |
| 9             | 6             | -2.506449               | -1.335848 | -0.272237 |
| 10            | 1             | -3.374558               | 0.307168  | 0.932833  |
| 11            | 1             | -3.349645               | 0.649075  | -0.801096 |
| 12            | 1             | -2.755068               | -1.951769 | 0.594931  |
| 13            | 1             | -3.098578               | -1.705162 | -1.109143 |
| 14            | 7             | -1.471532               | 0.766793  | 0.163596  |
| 15            | 6             | -1.308866               | 2.065283  | 0.786373  |
| 16            | 1             | -1.538339               | 2.874642  | 0.086790  |
| 17            | 1             | -1.982296               | 2.147098  | 1.641648  |
| 18            | 1             | -0.287667               | 2.184450  | 1.144123  |
| 19            | 6             | -0.514380               | -0.065842 | -0.256974 |
| 20            | 6             | -1.003163               | -1.358463 | -0.572094 |
| 21            | 1             | -0.673683               | -1.777243 | -1.521161 |

Energy = -590.8121828

E+ZPVE = -590.654797

Imaginary frequency = -1439.8 cm<sup>-1</sup>

**L: TS22, connecting 18 and 21**

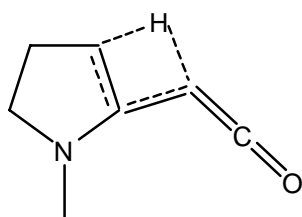

| Center Number | Atomic Number | Coordinates (Angstroms) |           |           |
|---------------|---------------|-------------------------|-----------|-----------|
|               |               | X                       | Y         | Z         |
| 1             | 6             | 1.248112                | -0.781413 | -0.098818 |
| 2             | 6             | 2.447838                | -0.322528 | 0.002226  |
| 3             | 8             | 3.580742                | -0.045601 | 0.137726  |
| 4             | 6             | -2.194605               | 0.559182  | -0.030893 |
| 5             | 6             | -2.337570               | -0.956716 | 0.279731  |
| 6             | 1             | -2.610957               | 1.198005  | 0.751033  |
| 7             | 1             | -2.666062               | 0.835889  | -0.980066 |

|    |   |           |           |           |
|----|---|-----------|-----------|-----------|
| 8  | 1 | -2.563964 | -1.103245 | 1.339720  |
| 9  | 1 | -3.154113 | -1.401575 | -0.289975 |
| 10 | 7 | -0.734545 | 0.783382  | -0.113957 |
| 11 | 6 | -0.135182 | 2.092117  | 0.012866  |
| 12 | 1 | -0.579848 | 2.634174  | 0.851643  |
| 13 | 1 | 0.933863  | 1.978802  | 0.189725  |
| 14 | 1 | -0.276012 | 2.683615  | -0.896568 |
| 15 | 1 | 0.460192  | -1.867842 | 0.417676  |
| 16 | 6 | -0.961705 | -1.514515 | -0.093558 |
| 17 | 1 | -0.890010 | -2.246637 | -0.892863 |
| 18 | 6 | -0.093089 | -0.381135 | -0.203961 |

-----  
 Energy = - 402.1070418

E+ZPVE = - 401.965826

Imaginary frequency = -1891.2 cm<sup>-1</sup>

**M: TS20, connecting 19 and 21**

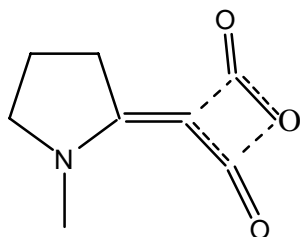

| Center Number | Atomic Number | Coordinates (Angstroms) |           |           |
|---------------|---------------|-------------------------|-----------|-----------|
|               |               | X                       | Y         | Z         |
| 1             | 6             | 2.002886                | -1.028979 | -0.059602 |
| 2             | 6             | 1.478306                | 1.248080  | 0.068970  |
| 3             | 8             | 1.957609                | 2.288102  | 0.156615  |
| 4             | 8             | 3.096477                | -0.428237 | -0.085323 |
| 5             | 8             | 1.682085                | -2.209697 | -0.084989 |
| 6             | 6             | 0.842117                | 0.058799  | 0.013867  |
| 7             | 6             | -2.604982               | -1.364203 | -0.133458 |
| 8             | 6             | -2.858893               | 0.125049  | 0.110806  |
| 9             | 1             | -2.772057               | -1.601872 | -1.185434 |
| 10            | 1             | -3.260331               | -1.997827 | 0.461672  |
| 11            | 1             | -3.552711               | 0.575463  | -0.600162 |
| 12            | 1             | -3.225386               | 0.331099  | 1.122544  |
| 13            | 6             | -0.535816               | -0.166492 | 0.041548  |
| 14            | 7             | -1.520879               | 0.722799  | -0.058070 |
| 15            | 6             | -1.357277               | 2.161532  | -0.181508 |
| 16            | 1             | -1.045905               | 2.613402  | 0.763918  |
| 17            | 1             | -0.616077               | 2.392411  | -0.946983 |
| 18            | 1             | -2.307994               | 2.598672  | -0.480479 |

|    |   |           |           |           |
|----|---|-----------|-----------|-----------|
| 19 | 6 | -1.119275 | -1.543499 | 0.220202  |
| 20 | 1 | -0.574334 | -2.277568 | -0.368647 |
| 21 | 1 | -0.970806 | -1.836426 | 1.264687  |

Energy = -590.8390145

E+ZPVE = -590.677492

Imaginary frequency = -288.1 cm<sup>-1</sup>

**N: Ylidic ketene 25**

| Center<br>Number | Atomic<br>Number | Coordinates (Angstroms) |           |           |
|------------------|------------------|-------------------------|-----------|-----------|
|                  |                  | X                       | Y         | Z         |
| 1                | 6                | -1.370784               | -1.407317 | 0.154892  |
| 2                | 6                | 0.298136                | 1.858471  | -0.001479 |
| 3                | 6                | 2.343283                | -0.390689 | -0.024120 |
| 4                | 1                | -1.503084               | -1.777831 | 1.182534  |
| 5                | 1                | -1.329238               | -2.288541 | -0.492237 |
| 6                | 1                | 1.368535                | 1.770070  | 0.034225  |
| 7                | 1                | -0.179294               | 2.818831  | -0.082119 |
| 8                | 7                | -0.479054               | 0.764773  | 0.011980  |
| 9                | 8                | 3.410236                | 0.079383  | -0.026068 |
| 10               | 6                | 1.183589                | -1.033917 | -0.018589 |
| 11               | 1                | 1.316162                | -2.111318 | -0.058127 |
| 12               | 6                | -0.159196               | -0.534352 | 0.016231  |
| 13               | 6                | -2.510307               | -0.450044 | -0.238769 |
| 14               | 1                | -2.699884               | -0.517331 | -1.311486 |
| 15               | 1                | -3.445121               | -0.655596 | 0.283394  |
| 16               | 6                | -1.951943               | 0.928135  | 0.111534  |
| 17               | 1                | -2.266585               | 1.722280  | -0.564994 |
| 18               | 1                | -2.186682               | 1.229239  | 1.135294  |

Energy = -402.1662874

E+ZPVE = -402.020527

**O: TS24, connecting 21 and 25**

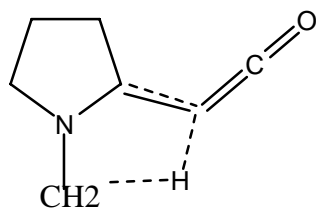

| Center<br>Number | Atomic<br>Number | Coordinates (Angstroms) |   |   |
|------------------|------------------|-------------------------|---|---|
|                  |                  | X                       | Y | Z |



---

|    |   |           |           |           |
|----|---|-----------|-----------|-----------|
| 1  | 6 | 1.278923  | 0.407199  | -0.183762 |
| 2  | 6 | 2.481012  | -0.079733 | -0.059599 |
| 3  | 8 | 3.599801  | -0.396685 | 0.058363  |
| 4  | 6 | -2.299917 | 0.154042  | 0.083369  |
| 5  | 6 | -2.029617 | -1.337572 | -0.190581 |
| 6  | 1 | -2.758022 | 0.331632  | 1.060771  |
| 7  | 1 | -2.929795 | 0.627378  | -0.671630 |
| 8  | 1 | -2.682495 | -1.986574 | 0.391249  |
| 9  | 1 | -2.193301 | -1.559785 | -1.245979 |
| 10 | 7 | -0.962317 | 0.763477  | 0.059324  |
| 11 | 6 | -0.626523 | 2.141015  | -0.016503 |
| 12 | 1 | -0.317647 | 2.555872  | 0.942412  |
| 13 | 1 | 0.947294  | 1.569086  | -0.422206 |
| 14 | 1 | -1.398157 | 2.727394  | -0.508194 |
| 15 | 6 | 0.007590  | -0.140573 | 0.027801  |
| 16 | 6 | -0.531171 | -1.529688 | 0.156091  |
| 17 | 1 | -0.016926 | -2.225681 | -0.507660 |
| 18 | 1 | -0.394920 | -1.898317 | 1.178165  |

---

Energy = -402.1484942

E+ZPVE = -402.005393

Imaginary frequency = - 898.9 cm<sup>-1</sup>

### P: Bicyclic pyrrolinone 27

---

| Center<br>Number | Atomic<br>Number | Coordinates (Angstroms) |           |           |
|------------------|------------------|-------------------------|-----------|-----------|
|                  |                  | X                       | Y         | Z         |
| 1                | 6                | 1.667015                | 1.251395  | 0.063921  |
| 2                | 6                | -1.017221               | -1.186667 | -0.042827 |
| 3                | 6                | -1.910382               | 0.086847  | 0.008850  |
| 4                | 1                | 1.785458                | 1.705805  | 1.051309  |
| 5                | 1                | 1.887367                | 2.025125  | -0.672737 |
| 6                | 1                | -1.318900               | -1.845723 | -0.858150 |
| 7                | 1                | -1.104323               | -1.731966 | 0.903081  |
| 8                | 7                | 0.318367                | -0.642127 | -0.220491 |
| 9                | 8                | -3.126596               | 0.059907  | 0.035840  |
| 10               | 6                | -0.993826               | 1.211838  | 0.021991  |
| 11               | 1                | -1.284943               | 2.247608  | 0.086430  |
| 12               | 6                | 0.271991                | 0.714659  | -0.067661 |
| 13               | 6                | 2.552119                | -0.011801 | -0.102382 |
| 14               | 1                | 2.913629                | -0.081966 | -1.129270 |
| 15               | 1                | 3.419065                | -0.007514 | 0.557133  |
| 16               | 6                | 1.602673                | -1.191717 | 0.191046  |
| 17               | 1                | 1.852211                | -2.088688 | -0.377734 |
| 18               | 1                | 1.600419                | -1.454373 | 1.259020  |

---

Energy = -402.2464502  
E+ZPVE = -402.096226

**Q: TS26, connecting 25 and 27**

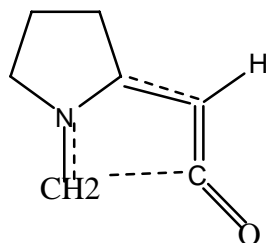

| Center Number | Atomic Number | Coordinates (Angstroms) |           |           |
|---------------|---------------|-------------------------|-----------|-----------|
|               |               | X                       | Y         | Z         |
| 1             | 6             | -1.435883               | -1.391389 | 0.023543  |
| 2             | 6             | 0.458546                | 1.748787  | -0.110712 |
| 3             | 6             | 2.271782                | -0.348141 | 0.097653  |
| 4             | 1             | -1.477480               | -1.903034 | 0.995373  |
| 5             | 1             | -1.513033               | -2.168320 | -0.742075 |
| 6             | 1             | 1.331243                | 1.613439  | -0.729100 |
| 7             | 1             | 0.079975                | 2.747472  | 0.036218  |
| 8             | 7             | -0.446849               | 0.739689  | -0.062932 |
| 9             | 8             | 3.373480                | 0.031844  | 0.062009  |
| 10            | 6             | 1.142970                | -1.059022 | -0.045328 |
| 11            | 1             | 1.304512                | -2.130056 | 0.034295  |
| 12            | 6             | -0.188695               | -0.566559 | -0.091582 |
| 13            | 6             | -2.554972               | -0.337814 | -0.115190 |
| 14            | 1             | -2.911771               | -0.304029 | -1.145934 |
| 15            | 1             | -3.410820               | -0.544184 | 0.527506  |
| 16            | 6             | -1.873096               | 0.985865  | 0.242016  |
| 17            | 1             | -2.228420               | 1.836432  | -0.338791 |
| 18            | 1             | -1.958017               | 1.229349  | 1.304566  |

Energy = -402.1645706  
E+ZPVE = -402.018958  
Imaginary frequency = - 262.8cm<sup>-1</sup>

**R: E-carboxyketene 32**

| Center Number | Atomic Number | Coordinates (Angstroms) |           |           |
|---------------|---------------|-------------------------|-----------|-----------|
|               |               | X                       | Y         | Z         |
| 1             | 6             | 1.976468                | -0.878945 | 0.141823  |
| 2             | 6             | 1.181744                | 1.334419  | -0.446836 |
| 3             | 8             | 1.519342                | 2.405437  | -0.722253 |
| 4             | 8             | 1.806520                | -2.064001 | 0.205074  |

|    |   |           |           |           |
|----|---|-----------|-----------|-----------|
| 5  | 6 | 0.873894  | 0.087375  | -0.100584 |
| 6  | 6 | -2.606410 | -1.368696 | -0.214685 |
| 7  | 6 | -2.786388 | 0.150542  | -0.435159 |
| 8  | 1 | -3.066809 | -1.940077 | -1.023543 |
| 9  | 1 | -3.052601 | -1.728846 | 0.720243  |
| 10 | 1 | -2.975643 | 0.357183  | -1.491090 |
| 11 | 1 | -3.601096 | 0.584429  | 0.144155  |
| 12 | 6 | -0.546233 | -0.289381 | -0.097360 |
| 13 | 7 | -1.492571 | 0.787645  | -0.060349 |
| 14 | 6 | -1.551451 | 1.503011  | 1.223250  |
| 15 | 1 | -1.893779 | 0.864376  | 2.050464  |
| 16 | 1 | -0.568735 | 1.894933  | 1.486080  |
| 17 | 1 | -2.229686 | 2.351447  | 1.127394  |
| 18 | 6 | -1.102386 | -1.499092 | -0.203186 |
| 19 | 1 | -0.557376 | -2.424979 | -0.285715 |
| 20 | 8 | 3.237734  | -0.377716 | 0.280884  |
| 21 | 1 | 3.249531  | 0.582853  | 0.381234  |

Energy = -590.8269446

E+ZPVE = -590.665154

### S:Ynol 34

| Center<br>Number | Atomic<br>Number | Coordinates (Angstroms) |           |           |
|------------------|------------------|-------------------------|-----------|-----------|
|                  |                  | X                       | Y         | Z         |
| 1                | 6                | 1.270282                | -0.302837 | -0.003755 |
| 2                | 6                | 2.468942                | -0.225456 | -0.009095 |
| 3                | 6                | -2.319759               | 0.371346  | 0.035691  |
| 4                | 6                | -2.344379               | -1.165397 | -0.055666 |
| 5                | 1                | -2.520613               | 0.690511  | 1.071401  |
| 6                | 1                | -3.039845               | 0.863538  | -0.619691 |
| 7                | 1                | -3.024055               | -1.612437 | 0.672704  |
| 8                | 1                | -2.672552               | -1.495957 | -1.050266 |
| 9                | 7                | -0.941490               | 0.737487  | -0.332537 |
| 10               | 6                | -0.508884               | 2.051032  | 0.107282  |
| 11               | 1                | -0.586499               | 2.176100  | 1.199787  |
| 12               | 1                | 0.525847                | 2.218929  | -0.188798 |
| 13               | 1                | -1.128784               | 2.812634  | -0.369496 |
| 14               | 6                | -0.148441               | -0.393945 | -0.016055 |
| 15               | 6                | -0.892096               | -1.500577 | 0.168511  |
| 16               | 1                | -0.493858               | -2.492079 | 0.317027  |
| 17               | 8                | 3.770652                | -0.086301 | 0.066059  |
| 18               | 1                | 4.211572                | -0.638237 | -0.594850 |

Energy = -402.150622

E+ZPVE = -402.004157

**T: TS 33, connecting 32 and 34**

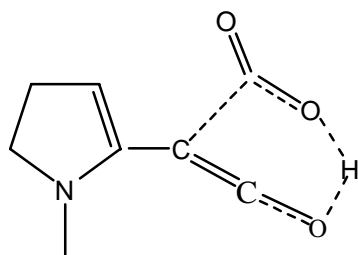

| Center Number | Atomic Number | Coordinates (Angstroms) |           |           |
|---------------|---------------|-------------------------|-----------|-----------|
|               |               | X                       | Y         | Z         |
| 1             | 6             | -1.839090               | 0.748461  | -0.793225 |
| 2             | 6             | -1.665809               | -1.118201 | 0.736571  |
| 3             | 8             | -2.878442               | -1.240068 | 0.955263  |
| 4             | 8             | -1.081650               | 1.396356  | -1.410595 |
| 5             | 6             | -0.616998               | -0.663394 | 0.252113  |
| 6             | 6             | 2.954300                | -0.864189 | -0.762486 |
| 7             | 6             | 2.887857                | 0.393457  | 0.125544  |
| 8             | 1             | 3.487771                | -1.679438 | -0.256682 |
| 9             | 1             | 3.468783                | -0.679435 | -1.707259 |
| 10            | 1             | 3.717184                | 0.477804  | 0.828975  |
| 11            | 1             | 2.871512                | 1.298784  | -0.501512 |
| 12            | 6             | 0.788669                | -0.545266 | 0.019926  |
| 13            | 7             | 1.605548                | 0.268930  | 0.840949  |
| 14            | 6             | 1.079953                | 1.499808  | 1.401973  |
| 15            | 1             | 0.930744                | 2.282204  | 0.642175  |
| 16            | 1             | 0.129253                | 1.305007  | 1.897860  |
| 17            | 1             | 1.777379                | 1.876373  | 2.152343  |
| 18            | 6             | 1.494810                | -1.204091 | -0.914524 |
| 19            | 1             | 1.089877                | -1.949836 | -1.580518 |
| 20            | 8             | -3.040886               | 0.595372  | -0.541762 |
| 21            | 1             | -3.205647               | -0.306762 | 0.219379  |

Energy = -590.7592025

E+ZPVE = -590.603148

Imaginary frequency = -1231.2 cm<sup>-1</sup>

Tables of Cartesian coordinates and energies for species **35–39** at  
B3LYP/6-31G(2df,p) level

**35a**

Energy = -628.20344

|   |          |          |          |
|---|----------|----------|----------|
| C | -0.38981 | 0.00606  | -0.39309 |
| C | 0.95200  | 0.00908  | -0.29022 |
| C | -1.36141 | 0.01620  | -1.22600 |
| O | -2.34941 | 0.02278  | -1.86293 |
| N | 1.61749  | -0.00695 | 0.87904  |
| H | 1.62096  | 0.02620  | -1.15476 |
| C | 0.94952  | -0.03528 | 2.16711  |
| H | 1.70136  | -0.01255 | 2.95774  |
| H | 0.34183  | -0.94038 | 2.26945  |
| H | 0.28396  | 0.82718  | 2.27267  |
| H | 2.62299  | -0.01038 | 0.85824  |

**36a**

Energy = -628.14291

|   |          |          |          |
|---|----------|----------|----------|
| H | 1.45787  | 0.94094  | 1.72077  |
| H | 1.25631  | -0.39655 | 2.93724  |
| O | 0.17733  | 0.13876  | -2.86185 |
| C | 0.05453  | -0.19647 | -0.41624 |
| C | 0.05905  | -0.02647 | -1.71060 |
| C | -0.92915 | -0.01611 | 0.56209  |
| H | 1.00531  | -0.46401 | 0.30674  |
| N | -0.43151 | 0.04436  | 1.79332  |
| H | -2.00063 | 0.02388  | 0.41651  |
| C | 0.97368  | -0.00612 | 1.96240  |
| H | -1.06552 | -0.05383 | 2.57433  |

**37a**

Energy = -628.15438

|   |          |          |          |
|---|----------|----------|----------|
| C | 0.77826  | -0.16650 | 0.48018  |
| O | -0.04113 | 0.31023  | -2.89900 |
| C | -0.14792 | 0.00888  | -1.77650 |
| H | -1.17483 | -0.87569 | -0.24426 |
| C | -0.24664 | -0.37226 | -0.51771 |
| N | 0.43650  | 0.03639  | 1.75832  |
| C | -0.75041 | 0.16021  | 2.36239  |
| H | -1.64316 | 0.23175  | 1.76472  |
| H | -0.76826 | 0.20782  | 3.43728  |
| H | 1.22950  | 0.06031  | 2.38778  |
| H | 1.83052  | -0.14282 | 0.24806  |

**38a**

Energy = -628.15248

|   |          |          |          |
|---|----------|----------|----------|
| C | -1.25793 | 0.04946  | 1.14197  |
| C | -0.01517 | -0.09923 | -1.30885 |
| C | 1.07501  | 0.02484  | -0.53914 |
| C | 1.13045  | 0.03752  | 0.88090  |
| H | -2.03855 | -0.10713 | 1.87086  |
| H | 2.00482  | -0.05983 | -1.09503 |
| H | -1.46178 | 0.69351  | 0.29968  |
| O | -0.80328 | -0.07340 | -2.17125 |
| N | 0.01586  | 0.01053  | 1.60652  |
| H | 2.07413  | 0.06486  | 1.40200  |
| H | 0.14249  | -0.15343 | 2.59761  |

**39a**

Energy = -628.24957

|   |          |          |          |
|---|----------|----------|----------|
| C | 1.11777  | 0.03140  | -0.36601 |
| C | -0.37614 | 0.01235  | -0.79214 |
| C | -1.12826 | 0.00600  | 0.45759  |
| C | -0.24081 | -0.01093 | 1.48424  |
| H | 1.57895  | 0.97633  | -0.67491 |
| H | -2.20383 | -0.00669 | 0.53463  |
| H | 1.66429  | -0.79084 | -0.83694 |
| O | -0.76064 | -0.00104 | -1.94214 |
| N | 1.06795  | -0.10108 | 1.08669  |
| H | -0.46042 | 0.00896  | 2.54538  |
| H | 1.79511  | 0.29520  | 1.66010  |

**35b**

Energy = -285.37379

|   |          |          |          |
|---|----------|----------|----------|
| C | -0.60954 | 0.00000  | -0.69384 |
| C | 0.71863  | 0.00000  | -0.65936 |
| C | -1.72256 | 0.00000  | -1.32601 |
| O | -2.80804 | 0.00000  | -1.77094 |
| S | 1.70927  | 0.00000  | 0.76576  |
| H | 1.34569  | 0.00000  | -1.55335 |
| C | 0.46145  | 0.00000  | 2.08437  |
| H | 1.00608  | 0.00000  | 3.02955  |
| H | -0.16182 | -0.89143 | 2.00410  |
| H | -0.16182 | 0.89143  | 2.00410  |

**36b**

Energy = -285.30664

|   |          |          |          |
|---|----------|----------|----------|
| H | 0.25688  | -0.90954 | -2.22665 |
| H | -0.34661 | 0.64246  | -2.99065 |
| O | 2.25416  | -0.34160 | 2.30137  |
| C | 0.62423  | 0.11194  | 0.49008  |
| C | 1.45641  | -0.11474 | 1.48720  |

**37b**

Energy = -285.32590

|   |          |          |          |
|---|----------|----------|----------|
| C | 1.50368  | -0.00195 | -0.99174 |
| C | -0.09165 | 0.00679  | 1.73386  |
| C | -1.14687 | 0.00219  | 0.93103  |
| C | -1.22325 | -0.00362 | -0.50108 |
| H | 2.29456  | -0.00389 | -1.72656 |

|   |          |          |          |   |          |          |          |
|---|----------|----------|----------|---|----------|----------|----------|
| C | -0.76618 | 0.07532  | 0.49822  | H | -2.08108 | 0.00316  | 1.48809  |
| H | 0.94345  | 0.33462  | -0.61190 | H | 1.74068  | 0.00260  | 0.05952  |
| S | -1.52603 | 0.10838  | -1.02198 | O | 0.78028  | 0.01103  | 2.50755  |
| H | -1.38671 | -0.01188 | 1.38162  | S | -0.01521 | -0.00649 | -1.62254 |
| C | -0.16176 | 0.08467  | -2.07745 | H | -2.20464 | -0.00669 | -0.95329 |

### 38b

Energy = -285.32408

|   |          |          |          |
|---|----------|----------|----------|
| C | 1.56600  | 0.10564  | -0.48759 |
| C | -1.19591 | -0.11093 | -1.10910 |
| C | -1.39848 | -0.18009 | 0.21393  |
| C | -0.47226 | -0.02985 | 1.27796  |
| H | 2.53013  | 0.51436  | -0.75239 |
| H | -2.45721 | -0.24157 | 0.45799  |
| H | 1.10320  | -0.61819 | -1.14124 |
| O | -1.24471 | -0.18882 | -2.26956 |
| S | 1.16289  | 0.20539  | 1.12031  |
| H | -0.82074 | -0.13897 | 2.29603  |

### 39b

Energy = -285.40841

|   |          |          |          |
|---|----------|----------|----------|
| C | 0.93983  | 0.00011  | -0.69580 |
| C | -0.57309 | 0.00004  | -1.02142 |
| C | -1.35460 | -0.00010 | 0.21750  |
| C | -0.60637 | -0.00013 | 1.33478  |
| H | 1.41366  | 0.88704  | -1.12113 |
| H | -2.43627 | -0.00017 | 0.19927  |
| H | 1.41377  | -0.88670 | -1.12126 |
| O | -0.98961 | 0.00009  | -2.15788 |
| S | 1.12953  | -0.00001 | 1.12155  |
| H | -0.98131 | -0.00022 | 2.35091  |

### 35C

Energy = -305.22928

|   |          |          |          |
|---|----------|----------|----------|
| C | -0.37159 | 0.00000  | -0.34090 |
| C | 0.96110  | 0.00000  | -0.26027 |
| C | -1.33204 | 0.00000  | -1.19737 |
| O | -2.30597 | 0.00000  | -1.84542 |
| O | 1.67007  | 0.00000  | 0.86296  |
| H | 1.64134  | 0.00000  | -1.11263 |
| C | 0.93525  | 0.00000  | 2.09387  |
| H | 1.68448  | 0.00000  | 2.88523  |
| H | 0.30250  | -0.88933 | 2.15752  |
| H | 0.30250  | 0.88933  | 2.15752  |

### 36C

Energy = -305.15034

|   |          |          |          |
|---|----------|----------|----------|
| H | 1.40828  | 0.87910  | 1.66086  |
| H | 1.12264  | -0.26592 | 3.06327  |
| O | 0.05818  | 0.21706  | -2.84537 |
| C | 0.10939  | -0.20500 | -0.40453 |
| C | 0.03845  | 0.00416  | -1.70148 |
| C | -0.86292 | -0.03430 | 0.58280  |
| H | 1.05248  | -0.53877 | 0.17445  |
| O | -0.43957 | -0.01949 | 1.80772  |
| H | -1.93634 | 0.02316  | 0.45903  |
| C | 0.94909  | -0.04453 | 2.01381  |

### 37C

Energy = -305.15665

|   |          |          |          |
|---|----------|----------|----------|
| C | -1.22423 | 0.40723  | 1.25903  |
| C | 0.01351  | -0.38060 | -1.32909 |
| C | 1.04791  | -0.18781 | -0.51580 |
| C | 1.09327  | 0.20160  | 0.85186  |
| H | -1.53848 | 0.13498  | 0.26506  |
| H | 2.00126  | -0.36510 | -1.00660 |
| H | -1.89966 | 0.66180  | 2.05735  |
| O | -0.82053 | -0.57533 | -2.12110 |
| O | 0.04857  | 0.45178  | 1.58551  |
| H | 2.02977  | 0.31413  | 1.37289  |

### 38C

Energy = -305.15955

|   |          |          |          |
|---|----------|----------|----------|
| C | 0.90444  | -0.12690 | 0.38959  |
| O | -1.32822 | 1.30597  | -1.98438 |
| C | -0.72122 | 0.62881  | -1.25775 |
| H | -0.58693 | -1.33529 | -0.66286 |
| C | -0.18096 | -0.33173 | -0.52778 |
| O | 1.48527  | 1.03639  | 0.48837  |
| C | 1.28430  | 2.12807  | -0.21507 |
| H | 0.71416  | 2.08299  | -1.13042 |
| H | 1.86713  | 2.97496  | 0.10402  |
| H | 1.31223  | -0.87644 | 1.04822  |

### 39C

Energy = -305.27

|   |          |          |          |
|---|----------|----------|----------|
| C | 1.11707  | 0.00011  | -0.31395 |
| C | -0.34829 | 0.00006  | -0.79333 |
| C | -1.12207 | -0.00017 | 0.44764  |
| C | -0.23942 | -0.00017 | 1.46494  |
| H | 1.65410  | 0.89233  | -0.64666 |
| H | -2.19751 | -0.00028 | 0.52387  |
| H | 1.65415  | -0.89203 | -0.64679 |

Supplementary Material (ESI) for Organic and Biomolecular Chemistry  
This journal is © The Royal Society of Chemistry 2007

|   |          |          |          |
|---|----------|----------|----------|
| O | -0.70564 | 0.00016  | -1.94968 |
| O | 1.06328  | 0.00000  | 1.12519  |
| H | -0.41565 | -0.00028 | 2.53373  |
